# Supplementary material for: Exploring glycopeptide-resistance in Staphylococcus aureus: a combined proteomics and transcriptomics approach for the identification of resistance-related markers
Source: PubMed Central journal article supplement (PMC1687195; doi:10.1186/1471-2164-7-296), 2006-11-22
Supplement: 1471-2164-7-296-S7.pdf [file 1471-2164-7-296-S7.pdf]

**Additional file 7 : Differentially expressed transcripts between 14-4 and MRGR3**

| ORF number | 14-4/MRGR3  | Description                                                       | Expression |
|------------|-------------|-------------------------------------------------------------------|------------|
| MW0353     | 3.348       | hypothetical protein                                              | up         |
| MW0559     | 2.07        | conserved hypothetical protein                                    | up         |
| MW0918     | 0.408       | hypothetical protein                                              | down       |
| MW1600     | 2.309       | hypothetical protein                                              | up         |
| MW1929     | 2.056       | hypothetical protein                                              | up         |
| SA0041     | 2.851       | xylose repressor homologue                                        | up         |
| SA0107     | 0.348166667 | immunoglobulin G binding protein A precursor                      | down       |
| SA0191     | 3.79        | conserved hypothetical protein                                    | up         |
| SA0203     | 2.527       | hypothetical protein                                              | up         |
| SA0227     | 0.367       | conserved hypothetical protein                                    | down       |
| SA0272     | 0.5         | transmembrane protein Tmp7                                        | down       |
| SA0274     | 0.0124      | conserved hypothetical protein                                    | down       |
| SA0277     | 0.41        | hypothetical protein                                              | down       |
| SA0338     | 0.487       | hypothetical protein                                              | down       |
| SA0395     | 2.142       | hypothetical protein                                              | up         |
| SA0452     | 2.121       | VEG protein homologue                                             | up         |
| SA0467     | 0.498       | conserved hypothetical protein                                    | down       |
| SA0532     | 22.46       | hypothetical protein                                              | up         |
| SA0536     | 2.514       | hypothetical protein                                              | up         |
| SA0536.1   | 2.054       | vraX                                                              | up         |
| SA0591     | 2.365       | hypothetical protein                                              | up         |
| SA0653     | 0.456       | transcription repressor of fructose operon                        | down       |
| SA0688     | 0.395       | ferrichrome ABC transporter permease                              | down       |
| SA0689     | 0.336       | ferrichrome ABC transporter permease                              | down       |
| SA0797     | 2.274       | nifU protein                                                      | up         |
| SA0821     | 0.3285      | argininosuccinate lyase                                           | down       |
| SA0825     | 2.381666667 | type-I signal peptidase                                           | up         |
| SA0890     | 2.082       | conserved hypothetical protein                                    | up         |
| SA0918     | 0.359333333 | phosphoribosylaminoimidazolesuccinocarboxamide synthetase homolog | down       |
| SA1041     | 0.476       | pyrimidine operon repressor chainA                                | down       |
| SA1067     | 2.354       | 50S ribosomal protein L28                                         | up         |
| SA1113     | 0.439       | ribosome-binding factor A                                         | down       |
| SA1120     | 0.496       | transcription regulator GntR family                               | down       |
| SA1195     | 2.062       | peptide methionine sulfoxide reductase regulator MsrR             | up         |
| SA1272     | 0.349       | alanine dehydrogenase                                             | down       |
| SA1477     | 2.101       | hypothetical protein                                              | up         |
| SA1493     | 0.475       | uroporphyrinogen-III synthase                                     | down       |
| SA1621     | 0.343       | hypothetical protein                                              | down       |
| SA1640     | 2.1         | conserved hypothetical protein                                    | up         |
| SA1674     | 0.423       | glutamate ABC transporter ATP-binding protein                     | down       |

| ORF number | 14-4/MRGR3 | Description                                                                    | Expression |
|------------|------------|--------------------------------------------------------------------------------|------------|
| SA1752     | 2.0435     | truncated beta-hemolysin                                                       | up         |
| SA1815     | 0.283      | Na <sup>+</sup> -transporting ATP synthase                                     | down       |
| SA1835     | 0.468      | integrase                                                                      | down       |
| SA1840     | 0.37       | conserved hypothetical protein                                                 | down       |
| SA1979     | 0.497      | hypothetical protein, similar to ferrichrome ABC transporter (binding protein) | down       |
| SA1984     | 0.445      | alkaline shock protein 23                                                      | down       |
| SA2007     | 0.344      | alpha-acetolactate decarboxylase                                               | down       |
| SA2091     | 0.497      | hypothetical protein                                                           | down       |
| SA2113     | 2.566      | hypothetical protein                                                           | up         |
| SA2146     | 2.824      | tcaA protein                                                                   | up         |
| SA2303     | 0.3385     | membrane spanning protein                                                      | down       |
| SA2343     | 2.683      | hypothetical protein                                                           | up         |
| SA2412     | 2.227      | uroporphyrin-III C-methyltransferase                                           | up         |
| SA2429     | 4.051      | arginine repressor                                                             | up         |
| SA2432     | 0.451      | hypothetical protein                                                           | down       |
| SA2480     | 2.5445     | Drp35                                                                          | up         |
| SA2481     | 2.238      | conserved hypothetical protein                                                 | up         |
| SACOL1582  | 0.218      | conserved hypothetical protein                                                 | down       |
| SACOL1583  | 0.11       | conserved hypothetical protein                                                 | down       |
| SACOL1586  | 0.161      | conserved hypothetical protein                                                 | down       |
| SACOL2187  | 3.094      | hypothetical protein                                                           | up         |
| SACOL2380  | 2.328      | hypothetical protein                                                           | up         |
| SACOL2558  | 3.579      | hypothetical protein                                                           | up         |
| SACOL2637  | 3.302      | hypothetical protein                                                           | up         |
| SAV0785    | 8.49       | hypothetical protein                                                           | up         |
| SAV0801    | 2.05       | hypothetical protein                                                           | up         |
| SAV0852    | 2.81       | hypothetical protein                                                           | up         |
